# Supplementary material
Source: PubMed Central journal article supplement (PMC3459405)
Supplement: gmb-35-3-575-suppl1.pdf [file gmb-35-3-575-suppl1.pdf]

**Table S1:** Pearson Correlation of continuous traits. Correlation coefficient (r) below and p-values above the diagonal. Correlation significant at a 95% confidence level.

|               | Age    | Weight | Height | BMI    | FM     | FFM    | TG     | TL     | TC     | LDL    | VLDL   | HDL    | GLU    | SBP    | DBP    | LIP    | EUR    | AMR    | AFR    |
|---------------|--------|--------|--------|--------|--------|--------|--------|--------|--------|--------|--------|--------|--------|--------|--------|--------|--------|--------|--------|
| <b>Age</b>    | -      | <0.001 | 0.014  | 0.006  | 0.023  | 0.014  | 0.707  | 0.048  | 0.069  | 0.048  | 0.179  | 0.101  | 0.978  | 0.980  | 0.285  | 0.703  | 0.671  | 0.594  | 0.976  |
| <b>Weight</b> | -0.290 | -      | <0.001 | <0.001 | <0.001 | <0.001 | 0.081  | 0.004  | 0.125  | 0.169  | 0.002  | 0.005  | 0.049  | 0.286  | 0.142  | 0.378  | 0.037  | 0.261  | 0.190  |
| <b>Height</b> | -0.184 | 0.309  | -      | 0.018  | 0.981  | 0.909  | 0.580  | 0.856  | 0.764  | 0.634  | 0.482  | 0.770  | 0.713  | 0.618  | 0.742  | 0.007  | 0.849  | 0.356  | 0.494  |
| <b>BMI</b>    | -0.208 | 0.878  | -0.179 | -      | <0.001 | <0.001 | 0.045  | 0.003  | 0.127  | 0.184  | <0.001 | 0.002  | 0.026  | 0.201  | 0.106  | 0.026  | 0.028  | 0.124  | 0.303  |
| <b>FM</b>     | -0.171 | 0.691  | -0.002 | 0.717  | -      | <0.001 | 0.442  | 0.013  | 0.278  | 0.298  | 0.003  | 0.011  | 0.087  | 0.864  | 0.187  | 0.237  | 0.065  | 0.082  | 0.662  |
| <b>FFM</b>    | 0.186  | -0.704 | -0.009 | -0.726 | -0.941 | -      | 0.482  | 0.014  | 0.228  | 0.237  | 0.003  | 0.010  | 0.050  | 0.407  | 0.455  | 0.135  | 0.055  | 0.065  | 0.677  |
| <b>TG</b>     | -0.029 | 0.132  | -0.042 | 0.151  | 0.058  | -0.053 | -      | <0.001 | <0.001 | 0.792  | <0.001 | 0.282  | 0.001  | 0.012  | 0.006  | 0.485  | 0.941  | 0.047  | 0.063  |
| <b>TL</b>     | -0.149 | 0.218  | 0.014  | 0.223  | 0.188  | -0.184 | 0.402  | -      | <0.001 | <0.001 | <0.001 | 0.287  | 0.380  | 0.025  | 0.007  | 0.450  | 0.648  | 0.353  | 0.704  |
| <b>TC</b>     | -0.138 | 0.116  | 0.023  | 0.116  | 0.082  | -0.091 | 0.271  | 0.819  | -      | <0.001 | 0.005  | <0.001 | 0.296  | 0.207  | 0.137  | 0.467  | 0.297  | 0.999  | 0.226  |
| <b>LDL</b>    | -0.150 | 0.104  | 0.036  | 0.101  | 0.079  | -0.090 | -0.020 | 0.677  | 0.903  | -      | 0.761  | 0.219  | 0.044  | 0.709  | 0.606  | 0.343  | 0.230  | 0.475  | 0.035  |
| <b>VLDL</b>   | -0.102 | 0.235  | -0.053 | 0.267  | 0.225  | -0.227 | 0.643  | 0.611  | 0.209  | -0.023 | -      | 0.006  | <0.001 | 0.003  | 0.004  | 0.904  | 0.433  | 0.118  | 0.014  |
| <b>HDL</b>    | 0.124  | -0.212 | 0.022  | -0.236 | -0.192 | 0.193  | -0.082 | 0.081  | 0.276  | 0.093  | -0.207 | -      | 0.252  | 0.120  | 0.160  | 0.459  | 0.449  | 0.885  | 0.462  |
| <b>GLU</b>    | 0.002  | 0.149  | -0.028 | 0.167  | 0.129  | -0.148 | 0.250  | 0.067  | -0.079 | -0.152 | 0.276  | -0.087 | -      | 0.501  | 0.853  | 0.227  | 0.717  | 0.521  | 0.835  |
| <b>SBP</b>    | -0.002 | 0.081  | -0.038 | 0.097  | 0.013  | -0.063 | 0.188  | 0.169  | 0.096  | 0.028  | 0.221  | -0.118 | 0.051  | -      | <0.001 | 0.200  | 0.442  | 0.326  | 0.944  |
| <b>DBP</b>    | -0.081 | 0.111  | -0.025 | 0.122  | 0.100  | -0.057 | 0.207  | 0.201  | 0.112  | 0.039  | 0.214  | -0.106 | 0.014  | 0.769  | -      | 0.211  | 0.013  | 0.221  | 0.096  |
| <b>LIP</b>    | -0.029 | -0.067 | 0.202  | -0.168 | -0.090 | 0.113  | -0.053 | 0.057  | 0.055  | 0.072  | 0.009  | 0.056  | -0.092 | -0.097 | -0.095 | -      | 0.943  | 0.663  | 0.610  |
| <b>EUR</b>    | 0.032  | 0.157  | -0.014 | 0.165  | 0.140  | -0.145 | -0.006 | -0.035 | -0.079 | -0.091 | 0.059  | -0.057 | 0.028  | -0.058 | -0.187 | 0.005  | -      | <0.001 | <0.001 |
| <b>AMR</b>    | -0.040 | -0.085 | 0.070  | -0.116 | -0.132 | 0.140  | 0.150  | 0.070  | 0.001  | -0.054 | 0.118  | 0.011  | -0.049 | 0.074  | 0.093  | 0.033  | -0.575 | -      | <0.001 |
| <b>AFR</b>    | 0.002  | -0.099 | -0.052 | -0.078 | -0.033 | 0.032  | -0.140 | -0.029 | 0.092  | 0.159  | -0.185 | 0.056  | 0.016  | -0.005 | 0.126  | -0.039 | -0.597 | -0.312 | -      |
