# Supplementary material
Source: PubMed Central journal article supplement (PMC3459405)
Supplement: gmb-35-3-575-suppl2.pdf [file gmb-35-3-575-suppl2.pdf]

**Table S2:** Independent-samples t-test comparing means of continuous traits among categorical groups. (\*) Correlation significant at 95% confidence level.

| Trait                     | Group  | Obesity |        |        | Hypertriglyceridemia |        |        | Hypercholesterolemia |        |        | Hyperlipidemia |        |        | Dyslipidemia |        |        |
|---------------------------|--------|---------|--------|--------|----------------------|--------|--------|----------------------|--------|--------|----------------|--------|--------|--------------|--------|--------|
|                           |        | N       | Mean   | p      | N                    | Mean   | p      | N                    | Mean   | p      | N              | Mean   | p      | N            | Mean   | p      |
| Age (years)               | Aff.   | 91      | 67.59  | 0.091  | 84                   | 67.90  | 0.380  | 135                  | 67.99  | 0.164  | 73             | 67.71  | 0.256  | 153          | 68.05  | 0.122  |
|                           | Unaff. | 85      | 69.07  |        | 92                   | 68.67  |        | 41                   | 69.34  |        | 103            | 68.73  |        | 23           | 70.00  |        |
| Weight (kg)               | Aff.   | 91      | 69.02  | <0.001 | 84                   | 64.93  | 0.022  | 135                  | 64.23  | 0.030  | 73             | 65.23  | 0.016  | 153          | 64.03  | 0.036  |
|                           | Unaff. | 85      | 57.00  | *      | 92                   | 61.65  | *      | 41                   | 59.87  | *      | 103            | 61.79  | *      | 23           | 57.78  | *      |
| Height (cm)               | Aff.   | 91      | 151.05 | 0.004  | 84                   | 151.54 | 0.108  | 135                  | 152.53 | 0.224  | 73             | 151.70 | 0.260  | 153          | 152.25 | 0.983  |
|                           | Unaff. | 85      | 153.52 | *      | 92                   | 152.89 |        | 41                   | 151.32 |        | 103            | 152.63 |        | 23           | 152.22 |        |
| BMI (kg/m <sup>2</sup> )  | Aff.   | 91      | 30.22  | <0.001 | 84                   | 28.28  | 0.001  | 135                  | 27.64  | 0.052  | 73             | 28.37  | 0.002  | 153          | 27.65  | 0.017  |
|                           | Unaff. | 85      | 24.13  | *      | 92                   | 26.37  | *      | 41                   | 26.08  |        | 103            | 26.51  | *      | 23           | 24.83  | *      |
| FM (%)                    | Aff.   | 91      | 40.94  | <0.001 | 84                   | 38.18  | 0.088  | 135                  | 37.64  | 0.287  | 73             | 38.39  | 0.056  | 153          | 37.63  | 0.241  |
|                           | Unaff. | 85      | 33.35  | *      | 92                   | 36.45  |        | 41                   | 36.07  |        | 103            | 36.49  |        | 23           | 34.91  |        |
| FFM (%)                   | Aff.   | 91      | 55.55  | <0.001 | 84                   | 57.99  | 0.073  | 135                  | 58.55  | 0.297  | 73             | 57.81  | 0.050  | 153          | 58.58  | 0.285  |
|                           | Unaff. | 85      | 62.44  | *      | 92                   | 59.70  |        | 41                   | 59.96  |        | 103            | 59.64  | *      | 23           | 60.91  |        |
| Triglycerides (mg/dL)     | Aff.   | 91      | 167.49 | 0.152  | 84                   | 217.64 | <0.001 | 135                  | 166.82 | 0.002  | 73             | 219.26 | <0.001 | 153          | 166.98 | <0.001 |
|                           | Unaff. | 85      | 146.26 |        | 92                   | 102.09 | *      | 41                   | 125.68 | *      | 103            | 113.28 | *      | 23           | 92.43  | *      |
| Total lipids (mg/dL)      | Aff.   | 91      | 756.23 | 0.272  | 84                   | 804.80 | <0.001 | 135                  | 791.69 | <0.001 | 73             | 832.06 | <0.001 | 153          | 769.94 | <0.001 |
|                           | Unaff. | 85      | 732.43 |        | 92                   | 689.89 | *      | 41                   | 590.12 | *      | 103            | 682.84 | *      | 23           | 577.04 | *      |
| Total cholesterol (mg/dL) | Aff.   | 91      | 233.15 | 0.977  | 84                   | 238.01 | 0.160  | 135                  | 248.67 | <0.001 | 73             | 247.67 | <0.001 | 153          | 240.24 | <0.001 |
|                           | Unaff. | 85      | 233.34 |        | 92                   | 228.89 |        | 41                   | 182.46 | *      | 103            | 223.02 | *      | 23           | 186.74 | *      |
| LDL (mg/dL)               | Aff.   | 91      | 140.31 | 0.897  | 84                   | 136.57 | 0.280  | 135                  | 152.65 | <0.001 | 73             | 145.75 | 0.082  | 153          | 145.27 | <0.001 |
|                           | Unaff. | 85      | 139.53 |        | 92                   | 143.00 |        | 41                   | 98.05  | *      | 103            | 135.81 |        | 23           | 104.43 | *      |
| VLDL (mg/dL)              | Aff.   | 91      | 31.92  | 0.029  | 84                   | 39.86  | <0.001 | 135                  | 31.32  | 0.004  | 73             | 39.65  | <0.001 | 153          | 31.58  | <0.001 |
|                           | Unaff. | 85      | 27.61  | *      | 92                   | 20.69  | *      | 41                   | 24.95  | *      | 103            | 22.89  | *      | 23           | 18.30  | *      |
| HDL (mg/dL)               | Aff.   | 91      | 59.52  | 0.003  | 84                   | 60.04  | 0.043  | 135                  | 62.29  | 0.099  | 73             | 60.02  | 0.076  | 153          | 61.50  | 0.498  |
|                           | Unaff. | 85      | 63.93  | *      | 92                   | 63.12  | *      | 41                   | 59.53  |        | 103            | 62.81  |        | 23           | 62.65  |        |
| Fasting glucose (mg/dL)   | Aff.   | 91      | 107.99 | 0.088  | 84                   | 112.54 | 0.001  | 135                  | 106.48 | 0.008  | 73             | 114.23 | 0.001  | 153          | 106.22 | <0.001 |
|                           | Unaff. | 85      | 100.40 |        | 92                   | 96.83  | *      | 41                   | 97.20  | *      | 103            | 97.30  | *      | 23           | 91.75  | *      |
| SBP (mmHg)                | Aff.   | 91      | 140.11 | 0.056  | 84                   | 143.04 | 0.001  | 135                  | 138.14 | 0.102  | 73             | 145.14 | <0.001 | 153          | 137.29 | 0.240  |
|                           | Unaff. | 85      | 132.47 |        | 92                   | 130.38 | *      | 41                   | 130.73 |        | 103            | 130.24 | *      | 23           | 130.65 |        |
| DBP (mmHg)                | Aff.   | 91      | 83.79  | 0.021  | 84                   | 83.69  | 0.041  | 135                  | 81.67  | 0.449  | 73             | 84.66  | 0.013  | 153          | 81.14  | 0.966  |
|                           | Unaff. | 85      | 78.35  | *      | 92                   | 78.86  | *      | 41                   | 79.52  |        | 103            | 78.69  | *      | 23           | 81.30  |        |
| Lipid intake (%)          | Aff.   | 91      | 33.66  | 0.083  | 84                   | 34.49  | 0.653  | 135                  | 34.54  | 0.244  | 73             | 34.66  | 0.460  | 153          | 34.41  | 0.512  |
|                           | Unaff. | 85      | 35.00  |        | 92                   | 34.14  |        | 41                   | 33.53  |        | 103            | 34.05  |        | 23           | 33.59  |        |
| EUR (%)                   | Aff.   | 91      | 60.15  | 0.042  | 84                   | 58.57  | 0.472  | 135                  | 57.69  | 0.896  | 73             | 59.51  | 0.198  | 153          | 57.50  | 0.808  |
|                           | Unaff. | 85      | 54.87  | *      | 92                   | 56.72  |        | 41                   | 57.32  |        | 103            | 56.25  |        | 23           | 58.26  |        |
| AMR (%)                   | Aff.   | 91      | 24.27  | 0.192  | 84                   | 28.01  | 0.039  | 135                  | 25.13  | 0.415  | 73             | 26.56  | 0.476  | 153          | 26.05  | 0.307  |
|                           | Unaff. | 85      | 27.13  |        | 92                   | 23.50  | *      | 41                   | 27.39  |        | 103            | 25.01  |        | 23           | 23.00  |        |
| AFR (%)                   | Aff.   | 91      | 15.57  | 0.281  | 84                   | 13.42  | 0.003  | 135                  | 17.19  | 0.434  | 73             | 13.93  | 0.026  | 153          | 16.44  | 0.447  |
|                           | Unaff. | 85      | 18.00  |        | 92                   | 19.78  | *      | 41                   | 15.29  |        | 103            | 18.74  | *      | 23           | 18.74  |        |

**Table S2:** Independent-samples t-test comparing means of continuous traits among categorical groups. (\*) Correlation significant at 95% confidence level.

| Trait                     | Group  | Glucose intolerance |        |        | Type 2 Diabetes |        |        | Hypertension |        |        | Normolipidic diet |        |        |
|---------------------------|--------|---------------------|--------|--------|-----------------|--------|--------|--------------|--------|--------|-------------------|--------|--------|
|                           |        | N                   | Mean   | p      | N               | Mean   | p      | N            | Mean   | p      | N                 | Mean   | p      |
| Age (years)               | Aff.   | 42                  | 68.93  | 0.432  | 24              | 69.46  | 0.329  | 147          | 68.30  | 0.970  | 117               | 68.26  | 0.902  |
|                           | Unaff. | 134                 | 68.11  |        | 152             | 68.13  |        | 29           | 68.34  |        | 59                | 68.39  |        |
| Weight (kg)               | Aff.   | 42                  | 64.33  | 0.369  | 24              | 65.33  | 0.238  | 147          | 63.86  | 0.047  | 117               | 63.97  | 0.132  |
|                           | Unaff. | 134                 | 62.86  |        | 152             | 62.88  |        | 29           | 59.97  | *      | 59                | 61.71  |        |
| Height (m)                | Aff.   | 42                  | 151.81 | 0.553  | 24              | 152.25 | 0.996  | 147          | 152.33 | 0.647  | 117               | 151.94 | 0.318  |
|                           | Unaff. | 134                 | 152.38 |        | 152             | 152.24 |        | 29           | 151.83 |        | 59                | 152.85 |        |
| BMI (kg/m <sup>2</sup> )  | Aff.   | 42                  | 27.97  | 0.221  | 24              | 28.22  | 0.229  | 147          | 27.54  | 0.055  | 117               | 27.73  | 0.028  |
|                           | Unaff. | 134                 | 27.07  |        | 152             | 27.13  |        | 29           | 26.00  |        | 59                | 26.40  | *      |
| FM (%)                    | Aff.   | 42                  | 37.60  | 0.732  | 24              | 37.32  | 0.976  | 147          | 37.30  | 0.922  | 117               | 38.11  | 0.025  |
|                           | Unaff. | 134                 | 37.17  |        | 152             | 37.27  |        | 29           | 37.17  |        | 59                | 35.62  | *      |
| FFM (%)                   | Aff.   | 42                  | 58.62  | 0.774  | 24              | 58.79  | 0.949  | 147          | 58.84  | 0.845  | 117               | 58.19  | 0.048  |
|                           | Unaff. | 134                 | 58.96  |        | 152             | 58.89  |        | 29           | 59.07  |        | 59                | 60.24  |        |
| Triglycerides (mg/dL)     | Aff.   | 42                  | 205.95 | 0.010  | 24              | 203.29 | 0.023  | 147          | 163.39 | 0.015  | 117               | 160.32 | 0.473  |
|                           | Unaff. | 134                 | 141.97 | *      | 152             | 149.97 | *      | 29           | 126.03 | *      | 59                | 151.12 |        |
| Total lipids (mg/dL)      | Aff.   | 42                  | 767.52 | 0.309  | 24              | 767.06 | 0.544  | 147          | 750.59 | 0.164  | 117               | 738.11 | 0.385  |
|                           | Unaff. | 134                 | 737.59 |        | 152             | 741.21 |        | 29           | 715.03 |        | 59                | 757.86 |        |
| Total cholesterol (mg/dL) | Aff.   | 42                  | 235.02 | 0.777  | 24              | 231.58 | 0.844  | 147          | 234.27 | 0.435  | 117               | 232.07 | 0.603  |
|                           | Unaff. | 134                 | 232.69 |        | 152             | 233.51 |        | 29           | 228.03 |        | 59                | 235.58 |        |
| LDL (mg/dL)               | Aff.   | 42                  | 134.31 | 0.295  | 24              | 130.87 | 0.225  | 147          | 139.82 | 0.927  | 117               | 138.42 | 0.465  |
|                           | Unaff. | 134                 | 141.69 |        | 152             | 141.36 |        | 29           | 140.52 |        | 59                | 142.93 |        |
| VLDL (mg/dL)              | Aff.   | 42                  | 35.82  | 0.002  | 24              | 38.30  | 0.006  | 147          | 30.80  | 0.036  | 117               | 29.58  | 0.693  |
|                           | Unaff. | 134                 | 27.97  | *      | 152             | 28.51  | *      | 29           | 24.97  | *      | 59                | 30.37  |        |
| HDL (mg/dL)               | Aff.   | 42                  | 62.10  | 0.767  | 24              | 62.08  | 0.852  | 147          | 61.54  | 0.725  | 117               | 61.43  | 0.673  |
|                           | Unaff. | 134                 | 61.51  |        | 152             | 61.58  |        | 29           | 62.24  |        | 59                | 62.10  |        |
| Fasting glucose (mg/dL)   | Aff.   | 42                  | 135.45 | <0.001 | 24              | 149.04 | <0.001 | 147          | 106.23 | 0.001  | 117               | 105.00 | 0.625  |
|                           | Unaff. | 134                 | 94.57  | *      | 152             | 97.26  | *      | 29           | 94.67  | *      | 59                | 102.98 |        |
| SBP (mmHg)                | Aff.   | 42                  | 138.69 | 0.459  | 24              | 140.63 | 0.310  | 147          | 141.63 | <0.001 | 117               | 134.62 | 0.232  |
|                           | Unaff. | 134                 | 135.71 |        | 152             | 135.76 |        | 29           | 110.00 | *      | 59                | 140.00 |        |
| DBP (mmHg)                | Aff.   | 42                  | 80.24  | 0.612  | 24              | 82.29  | 0.641  | 147          | 83.78  | <0.001 | 117               | 80.81  | 0.680  |
|                           | Unaff. | 134                 | 81.46  |        | 152             | 80.99  |        | 29           | 67.93  | *      | 59                | 81.86  |        |
| Lipid intake (%)          | Aff.   | 42                  | 33.99  | 0.592  | 24              | 33.40  | 0.269  | 147          | 34.13  | 0.313  | 117               | 31.74  | <0.001 |
|                           | Unaff. | 134                 | 34.41  |        | 152             | 34.45  |        | 29           | 35.22  |        | 59                | 39.39  | *      |
| EUR (%)                   | Aff.   | 42                  | 60.48  | 0.195  | 24              | 62.29  | 0.100  | 147          | 57.03  | 0.293  | 117               | 57.72  | 0.902  |
|                           | Unaff. | 134                 | 56.70  |        | 152             | 56.86  |        | 29           | 60.48  |        | 59                | 57.37  |        |
| AMR (%)                   | Aff.   | 42                  | 23.05  | 0.124  | 24              | 21.83  | 0.071  | 147          | 26.52  | 0.087  | 117               | 26.24  | 0.470  |
|                           | Unaff. | 134                 | 26.47  |        | 152             | 26.26  |        | 29           | 21.24  |        | 59                | 24.49  |        |
| AFR (%)                   | Aff.   | 42                  | 16.48  | 0.900  | 24              | 15.88  | 0.800  | 147          | 16.44  | 0.522  | 117               | 16.04  | 0.406  |
|                           | Unaff. | 134                 | 16.83  |        | 152             | 16.88  |        | 29           | 18.28  |        | 59                | 18.14  |        |
